# Supplementary material for: Electrical conductivity measurements as a proxy for diffusion-limited microbial activity in soils
Source: Copernicus journal article supplement (doi:10.5194/egusphere-2025-1730), 2025-06-16
Supplement: Supplementary file 1 [file egusphere-2025-1730-supplement.pdf]

S1: Experimental design

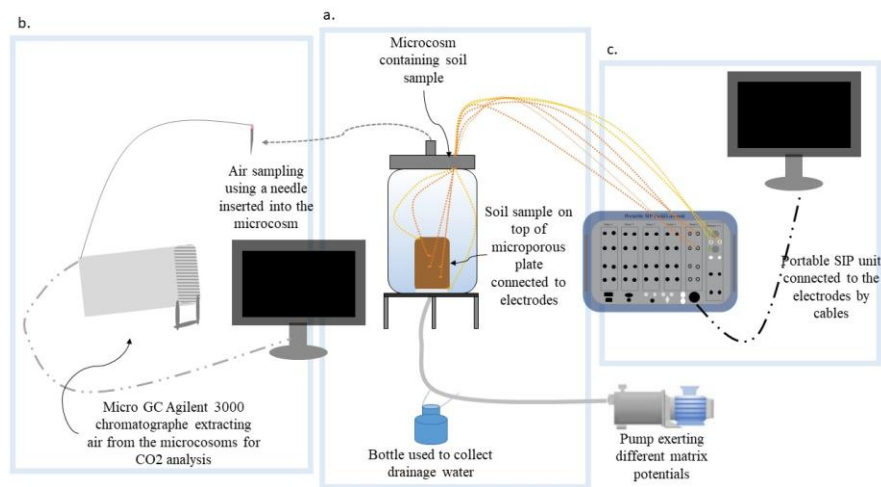

Fig. S1: Experimental set-up used to measure electrical conductivity and soil respiration rate at different matrix potentials. (a) Samples are placed on microporous plates inside an air-tightly closed microcosm. The microcosms are connected to a pump that exerts different matric potentials through drainage collecting bottles placed inside an 8°C fridge. (b) Micro GC Agilent 3000 connected to a needle used to directly take 20 ml from the microcosms for CO2 analysis. (c) Electrical conductivity is measured by a PSIP unit, current injection and potential measurements is performed through electrodes connected to the PSIP unit by cables sealed by silicone at the top of the microcosm.

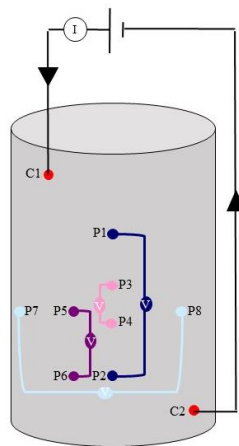

Fig. S2: Sketch of the electrode configuration used for the electrical conductivity measurements: C1 and C2 are the current electrodes (injection), while P1 to P8 are potential electrodes (potential measurements). Measurement pair 1 to 4 correspond to P1-P2, P3-P4, P5-P6, and P7-P8, respectively (see Table S1).

15 **Table S1:** Table showing the electrode pairs, their names indicated in Figure 3, the distance between the electrodes and the geometric factor calculated for each pair.

| Electrode Pairs | Electrode names | Distance/angle between electrodes | Geometric factor (in m) |
|-----------------|-----------------|-----------------------------------|-------------------------|
| Pair 1          | P1-P2           | 4 cm, vertical                    | 0.060                   |
| Pair 2          | P3-P4           | 1 cm, vertical                    | 0.199                   |
| Pair 3          | P5-P6           | 2 cm, vertical                    | 0.199                   |
| Pair 4          | P7-P8           | 45°, horizontal                   | 0.284                   |

**S2: Additional results of the paper**

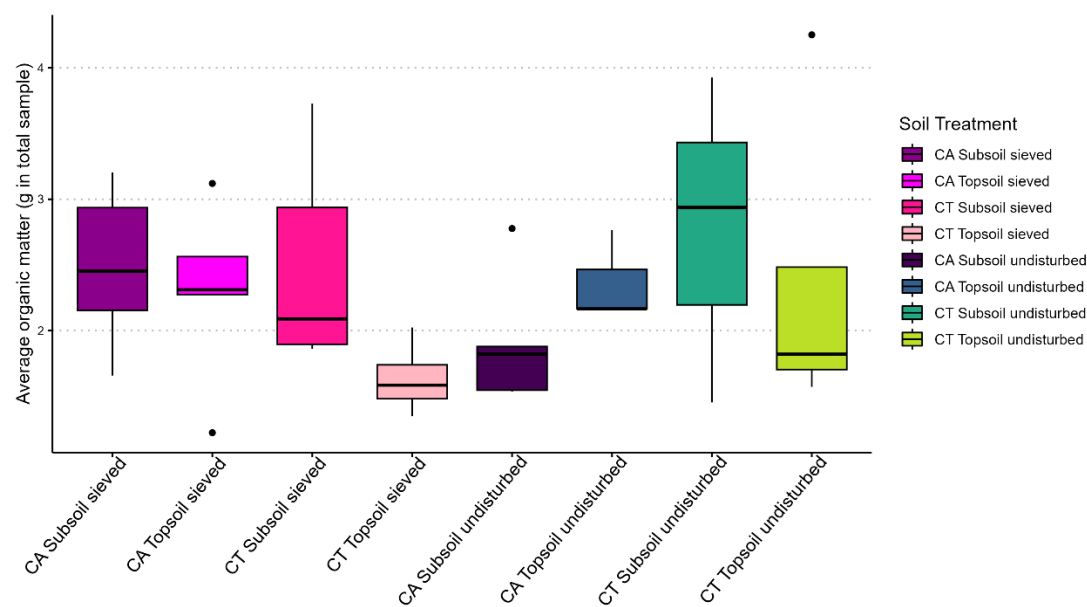

20 **Fig. S3:** Boxplot showing the organic matter content of each study site based on soil treatment. Each soil treatment consists of the triplicate samples with one of the triplicates being tested thrice to allow analytical verification of the laboratory results. CA stands for conservation agriculture while CT stands for conventional tillage. The undisturbed samples are undisturbed soil cores while the sieved samples were sieved down to a 2 mm particle size and packed to a bulk density of 1.73 g/cm<sup>3</sup>.

25

**Table S2: Average net respiration flux (in  $\mu\text{mol}/\text{hour}/\text{grams}$  of organic matter) at the highest measured saturation of  $-70\text{hPa}$ . CT stands for conventional tillage and CA stands for conservation agriculture. The sieved samples were sieved down to a 2 mm particle size and packed to a bulk density of  $1.73\text{ g}/\text{cm}^3$ .**

| Soil Treatment         | Mean Flux | Standard error of mean |
|------------------------|-----------|------------------------|
| CA Subsoil undisturbed | 13.98     | 4.25                   |
| CT Subsoil undisturbed | 7.38      | 4.75                   |
| CA Topsoil undisturbed | 31.55     | 2.12                   |
| CT Topsoil undisturbed | 19.46     | 1.79                   |
| CA Subsoil sieved      | 47.17     | 40.29                  |
| CT Subsoil sieved      | 88.14     | 52.700                 |
| CA Topsoil sieved      | 36.34     | 25.54                  |
| CT Topsoil sieved      | 32.42     | 0.14                   |

30

**Table S3: Average relative respiration flux and standard error of the mean relative respiration of each soil treatment type. The data was normalized to the values at  $-70\text{hPa}$  and is graphically represented in Fig.1 of the main body of the article. CT stands for conventional tillage and CA stands for conservation agriculture.**

| Treatment  | Soil structure | Applied suction | Average respiration | Standard error of the mean |
|------------|----------------|-----------------|---------------------|----------------------------|
| CA Subsoil | sieved         | -70             | 1                   | 0                          |
| CA Subsoil | sieved         | -100            | 6.184               | 5.466                      |
| CA Subsoil | sieved         | -250            | 0.400               | 0.035                      |
| CA Subsoil | sieved         | -350            | 0.055               | 0.009                      |
| CA Subsoil | sieved         | -450            | 0.157               | 0.050                      |
| CA Subsoil | sieved         | -630            | 0.046               | 0.012                      |
| CA Subsoil | sieved         | -996            | 0.145               | 0.065                      |
| CA Subsoil | undisturbed    | -70             | 1                   | 0                          |
| CA Subsoil | undisturbed    | -100            | 0.975               | 0.291                      |
| CA Subsoil | undisturbed    | -250            | 0.609               | 0.283                      |
| CA Subsoil | undisturbed    | -350            | 0.100               | 0.020                      |

|               |             |      |       |        |
|---------------|-------------|------|-------|--------|
| CA<br>Subsoil | undisturbed | -450 | 0.065 | 0.026  |
| CA<br>Subsoil | undisturbed | -630 | 0.049 | 0.020  |
| CA<br>Subsoil | undisturbed | -996 | 0.031 | 0.018  |
| CA<br>Topsoil | sieved      | -70  | 1     | 0      |
| CA<br>Topsoil | sieved      | -100 | 2.647 | 2.426  |
| CA<br>Topsoil | sieved      | -250 | 0.550 | 0.001  |
| CA<br>Topsoil | sieved      | -350 | 1.140 | 1.126  |
| CA<br>Topsoil | sieved      | -450 | 0.110 | 0.091  |
| CA<br>Topsoil | sieved      | -630 | 0.072 | 0.039  |
| CA<br>Topsoil | sieved      | -996 | 0.147 | 0.001  |
| CA<br>Topsoil | undisturbed | -70  | 1     | 0      |
| CA<br>Topsoil | undisturbed | -100 | 0.759 | 0.498  |
| CA<br>Topsoil | undisturbed | -250 | 4.452 | 3.556  |
| CA<br>Topsoil | undisturbed | -350 | 1.212 | 0.100  |
| CA<br>Topsoil | undisturbed | -450 | 0.184 | 0.139  |
| CA<br>Topsoil | undisturbed | -630 | 0.167 | 0.1340 |
| CA<br>Topsoil | undisturbed | -996 | 0.071 | 0.024  |
| CT<br>Subsoil | sieved      | -70  | 1     | 0      |
| CT<br>Subsoil | sieved      | -100 | 5.977 | 1.498  |
| CT<br>Subsoil | sieved      | -250 | 2.368 | 1.964  |
| CT<br>Subsoil | sieved      | -350 | 2.267 | 1.569  |

|            |             |      |       |       |
|------------|-------------|------|-------|-------|
| CT Subsoil | sieved      | -450 | 0.137 | 0.048 |
| CT Subsoil | sieved      | -630 | 0.137 | 0.106 |
| CT Subsoil | sieved      | -996 | 0.161 | 0.078 |
| CT Subsoil | undisturbed | -70  | 1     | 0     |
| CT Subsoil | undisturbed | -100 | 0.256 | 0.072 |
| CT Subsoil | undisturbed | -250 | 0.362 | 0.092 |
| CT Subsoil | undisturbed | -350 | 0.073 | 0.020 |
| CT Subsoil | undisturbed | -450 | 0.060 | 0.014 |
| CT Subsoil | undisturbed | -630 | 0.024 | 0.010 |
| CT Subsoil | undisturbed | -996 | 0.040 | 0.015 |
| CT Topsoil | sieved      | -70  | 1     | 0     |
| CT Topsoil | sieved      | -100 | 1.039 | 0.724 |
| CT Topsoil | sieved      | -250 | 0.502 | 0.134 |
| CT Topsoil | sieved      | -350 | 0.077 | 0.060 |
| CT Topsoil | sieved      | -450 | 0.056 | 0.002 |
| CT Topsoil | sieved      | -630 | 0.046 | 0.013 |
| CT Topsoil | sieved      | -996 | 0.081 | 0.006 |
| CT Topsoil | undisturbed | -70  | 1     | 0     |
| CT Topsoil | undisturbed | -100 | 0.368 | 0.176 |
| CT Topsoil | undisturbed | -250 | 1.235 | 1.133 |
| CT Topsoil | undisturbed | -350 | 0.204 | 0.164 |

|               |             |      |       |       |
|---------------|-------------|------|-------|-------|
| CT<br>Topsoil | undisturbed | -450 | 0.100 | 0.024 |
| CT<br>Topsoil | undisturbed | -630 | 0.040 | 0.014 |
| CT<br>Topsoil | undisturbed | -996 | 0.017 | 0.008 |

**Table S4: Mean ionic conductivity and standard error of mean of the water drainage. CA identifies the conservation agriculture fields and CT identifies the conventional tillage fields.**

| Soil Treatment | Soil structure | Mean    | Standard error of mean |
|----------------|----------------|---------|------------------------|
| CA Topsoil     | undisturbed    | 637.33  | 12.41                  |
| CA Subsoil     | undisturbed    | 463.67  | 22.51                  |
| CT Topsoil     | undisturbed    | 433.00  | 15.57                  |
| CT Subsoil     | undisturbed    | 413.67  | 38.89                  |
| CA Topsoil     | sieved         | 481.00  | 58.24                  |
| CA Subsoil     | sieved         | 597.67  | 48.90                  |
| CT Topsoil     | sieved         | 1052.33 | 8.69                   |
| CT Subsoil     | sieved         | 742.33  | 28.67                  |

- 35 **Table S5: Average relative electrical conductivity of the Electrode Pair 1 and standard error of the mean relative respiration of each soil treatment type. The data was normalized to the values at -70hPa and is graphically represented in Fig.2 of the main body of the article. CT stands for conventional tillage and CA stands for conservation agriculture. The sieved samples were sieved down to a 2 mm particle size and packed to a bulk density of 1.73 g/cm<sup>3</sup>.**

| Treatment  | Soil structure | Applied suction | Electrical Conductivity | Standard error of the mean |
|------------|----------------|-----------------|-------------------------|----------------------------|
| CA Subsoil | sieved         | -70             | 1.00                    | 0.00                       |
| CA Subsoil | sieved         | -100            | 0.65                    | 0.00                       |
| CA Subsoil | sieved         | -250            | 0.55                    | 0.00                       |
| CA Subsoil | sieved         | -350            | 0.53                    | 0.00                       |
| CA Subsoil | sieved         | -450            | 0.46                    | 0.00                       |

|            |             |      |      |      |
|------------|-------------|------|------|------|
| CA Subsoil | sieved      | -630 | 0.36 | 0.00 |
| CA Subsoil | undisturbed | -70  | 1.00 | 0.02 |
| CA Subsoil | undisturbed | -100 | 1.15 | 0.02 |
| CA Subsoil | undisturbed | -250 | 1.32 | 0.02 |
| CA Subsoil | undisturbed | -350 | 0.89 | 0.02 |
| CA Subsoil | undisturbed | -450 | 0.79 | 0.02 |
| CA Subsoil | undisturbed | -630 | 0.67 | 0.02 |
| CA Subsoil | undisturbed | -996 | 0.00 | 0.02 |
| CA Topsoil | sieved      | -70  | 1.00 | 0.00 |
| CA Topsoil | sieved      | -100 | 1.17 | 0.00 |
| CA Topsoil | sieved      | -250 | 0.71 | 0.00 |
| CA Topsoil | sieved      | -350 | 0.59 | 0.00 |
| CA Topsoil | sieved      | -450 | 0.47 | 0.00 |
| CA Topsoil | sieved      | -630 | 0.36 | 0.00 |
| CA Topsoil | sieved      | -996 | 0.00 | 0.00 |
| CA Topsoil | undisturbed | -70  | 1.00 | 0.02 |
| CA Topsoil | undisturbed | -100 | 1.05 | 0.02 |
| CA Topsoil | undisturbed | -250 | 0.78 | 0.02 |
| CA Topsoil | undisturbed | -350 | 0.76 | 0.02 |
| CA Topsoil | undisturbed | -450 | 0.71 | 0.02 |
| CA Topsoil | undisturbed | -630 | 0.59 | 0.02 |
| CA Topsoil | undisturbed | -996 | 0.00 | 0.02 |
| CT Subsoil | sieved      | -70  | 1.00 | 0.00 |
| CT Subsoil | sieved      | -100 | 1.07 | 0.00 |
| CT Subsoil | sieved      | -250 | 0.87 | 0.00 |
| CT Subsoil | sieved      | -350 | 0.95 | 0.00 |
| CT Subsoil | sieved      | -450 | 0.76 | 0.00 |
| CT Subsoil | sieved      | -630 | 0.60 | 0.00 |
| CT Subsoil | sieved      | -996 | 0.47 | 0.00 |
| CT Subsoil | undisturbed | -70  | 1.00 | 0.02 |
| CT Subsoil | undisturbed | -100 | 0.98 | 0.02 |
| CT Subsoil | undisturbed | -250 | 0.86 | 0.02 |
| CT Subsoil | undisturbed | -350 | 0.76 | 0.02 |
| CT Subsoil | undisturbed | -450 | 0.64 | 0.02 |
| CT Subsoil | undisturbed | -630 | 0.88 | 0.02 |
| CT Subsoil | undisturbed | -996 | 0.00 | 0.02 |
| CT Topsoil | sieved      | -70  | 1.00 | 0.00 |
| CT Topsoil | sieved      | -100 | 1.28 | 0.00 |
| CT Topsoil | sieved      | -250 | 0.97 | 0.00 |

|            |             |      |      |      |
|------------|-------------|------|------|------|
| CT Topsoil | sieved      | -350 | 0.83 | 0.00 |
| CT Topsoil | sieved      | -450 | 0.62 | 0.00 |
| CT Topsoil | sieved      | -630 | 0.51 | 0.00 |
| CT Topsoil | sieved      | -996 | 0.14 | 0.00 |
| CT Topsoil | undisturbed | -70  | 1.00 | 0.02 |
| CT Topsoil | undisturbed | -100 | 2.18 | 0.02 |
| CT Topsoil | undisturbed | -250 | 1.69 | 0.02 |
| CT Topsoil | undisturbed | -350 | 1.10 | 0.02 |
| CT Topsoil | undisturbed | -450 | 1.02 | 0.02 |
| CT Topsoil | undisturbed | -630 | 1.14 | 0.02 |
| CT Topsoil | undisturbed | -996 | 0.00 | 0.02 |

40 **Table S6: Average relative electrical conductivity of the Electrode Pair 2 and standard error of the mean relative respiration of each soil treatment type. The data was normalized to the values at -70hPa and is graphically represented in Fig.2 of the main body of the article. CT stands for conventional tillage and CA stands for conservation agriculture. The sieved samples were sieved down to a 2 mm particle size and packed to a bulk density of 1.73 g/cm<sup>3</sup>.**

| <b>Treatment</b> | <b>Soil structure</b> | <b>Applied suction</b> | <b>Electrical Conductivity</b> | <b>Standard error of the mean</b> |
|------------------|-----------------------|------------------------|--------------------------------|-----------------------------------|
| CA Subsoil       | sieved                | -70                    | 1.000                          | 0.015                             |
| CA Subsoil       | sieved                | -100                   | 0.891                          | 0.015                             |
| CA Subsoil       | sieved                | -250                   | 0.771                          | 0.015                             |
| CA Subsoil       | sieved                | -350                   | 0.799                          | 0.015                             |
| CA Subsoil       | sieved                | -450                   | 0.780                          | 0.015                             |
| CA Subsoil       | sieved                | -630                   | 0.498                          | 0.015                             |
| CA Subsoil       | undisturbed           | -70                    | 1.000                          | 0.009                             |
| CA Subsoil       | undisturbed           | -100                   | 0.986                          | 0.009                             |
| CA Subsoil       | undisturbed           | -250                   | 0.845                          | 0.009                             |
| CA Subsoil       | undisturbed           | -350                   | 0.737                          | 0.009                             |
| CA Subsoil       | undisturbed           | -450                   | 0.524                          | 0.009                             |
| CA Subsoil       | undisturbed           | -630                   | 0.431                          | 0.009                             |
| CA Subsoil       | undisturbed           | -996                   | 0.000                          | 0.009                             |
| CA Topsoil       | sieved                | -70                    | 1.000                          | 0.015                             |
| CA Topsoil       | sieved                | -100                   | 1.137                          | 0.015                             |
| CA Topsoil       | sieved                | -250                   | 0.818                          | 0.015                             |
| CA Topsoil       | sieved                | -350                   | 0.771                          | 0.015                             |
| CA Topsoil       | sieved                | -450                   | 0.566                          | 0.015                             |
| CA Topsoil       | sieved                | -630                   | 0.362                          | 0.015                             |
| CA Topsoil       | sieved                | -996                   | 0.000                          | 0.015                             |
| CA Topsoil       | undisturbed           | -70                    | 1.000                          | 0.009                             |



|            |             |      |       |       |
|------------|-------------|------|-------|-------|
| CA Topsoil | undisturbed | -100 | 1.066 | 0.009 |
| CA Topsoil | undisturbed | -250 | 0.791 | 0.009 |
| CA Topsoil | undisturbed | -350 | 0.763 | 0.009 |
| CA Topsoil | undisturbed | -450 | 0.714 | 0.009 |
| CA Topsoil | undisturbed | -630 | 0.591 | 0.009 |
| CA Topsoil | undisturbed | -996 | 0.000 | 0.009 |
| CT Subsoil | sieved      | -70  | 1.000 | 0.015 |
| CT Subsoil | sieved      | -100 | 1.108 | 0.015 |
| CT Subsoil | sieved      | -250 | 0.975 | 0.015 |
| CT Subsoil | sieved      | -350 | 1.017 | 0.015 |
| CT Subsoil | sieved      | -450 | 0.992 | 0.015 |
| CT Subsoil | sieved      | -630 | 0.716 | 0.015 |
| CT Subsoil | sieved      | -996 | 0.001 | 0.015 |
| CT Subsoil | undisturbed | -70  | 1.000 | 0.009 |
| CT Subsoil | undisturbed | -100 | 0.958 | 0.009 |
| CT Subsoil | undisturbed | -250 | 0.776 | 0.009 |
| CT Subsoil | undisturbed | -350 | 0.834 | 0.009 |
| CT Subsoil | undisturbed | -450 | 0.665 | 0.009 |
| CT Subsoil | undisturbed | -630 | 0.470 | 0.009 |
| CT Subsoil | undisturbed | -996 | 0.003 | 0.009 |
| CT Topsoil | sieved      | -70  | 1.000 | 0.015 |
| CT Topsoil | sieved      | -100 | 1.321 | 0.015 |
| CT Topsoil | sieved      | -250 | 1.501 | 0.015 |
| CT Topsoil | sieved      | -350 | 0.291 | 0.015 |
| CT Topsoil | sieved      | -450 | 1.163 | 0.015 |
| CT Topsoil | sieved      | -630 | 1.524 | 0.015 |
| CT Topsoil | sieved      | -996 | 0.183 | 0.015 |
| CT Topsoil | undisturbed | -70  | 1.000 | 0.009 |
| CT Topsoil | undisturbed | -100 | 1.053 | 0.009 |
| CT Topsoil | undisturbed | -250 | 0.754 | 0.009 |
| CT Topsoil | undisturbed | -350 | 0.548 | 0.009 |
| CT Topsoil | undisturbed | -450 | 0.453 | 0.009 |
| CT Topsoil | undisturbed | -630 | 0.477 | 0.009 |
| CT Topsoil | undisturbed | -996 | 0.000 | 0.009 |

**Table S7: Average relative electrical conductivity of the Electrode Pair 3 and standard error of the mean relative respiration of each soil treatment type. The data was normalized to the values at -70hPa and is graphically represented in Fig.2 of the main body of the article. CT stands for conventional tillage and CA stands for conservation agriculture. The sieved samples were sieved down to a 2 mm particle size and packed to a bulk density of 1.73 g/cm<sup>3</sup>.**

| Treatment  | Soil structure | Applied suction | Electrical Conductivity | Standard error of the mean |
|------------|----------------|-----------------|-------------------------|----------------------------|
| CA Subsoil | sieved         | -70             | 1.000                   | 0.003                      |
| CA Subsoil | sieved         | -100            | 0.939                   | 0.003                      |
| CA Subsoil | sieved         | -250            | 0.726                   | 0.003                      |
| CA Subsoil | sieved         | -350            | 0.695                   | 0.003                      |
| CA Subsoil | sieved         | -450            | 0.585                   | 0.003                      |
| CA Subsoil | sieved         | -630            | 0.455                   | 0.003                      |
| CA Subsoil | undisturbed    | -70             | 1.000                   | 0.005                      |
| CA Subsoil | undisturbed    | -100            | 0.990                   | 0.005                      |
| CA Subsoil | undisturbed    | -250            | 0.865                   | 0.005                      |
| CA Subsoil | undisturbed    | -350            | 0.757                   | 0.005                      |
| CA Subsoil | undisturbed    | -450            | 0.542                   | 0.005                      |
| CA Subsoil | undisturbed    | -630            | 0.424                   | 0.005                      |
| CA Subsoil | undisturbed    | -996            | 0.000                   | 0.005                      |
| CA Topsoil | sieved         | -70             | 1.000                   | 0.003                      |
| CA Topsoil | sieved         | -100            | 1.249                   | 0.003                      |
| CA Topsoil | sieved         | -250            | 0.842                   | 0.003                      |
| CA Topsoil | sieved         | -350            | 0.705                   | 0.003                      |
| CA Topsoil | sieved         | -450            | 0.560                   | 0.003                      |
| CA Topsoil | sieved         | -630            | 0.414                   | 0.003                      |
| CA Topsoil | sieved         | -996            | 0.000                   | 0.003                      |
| CA Topsoil | undisturbed    | -70             | 1.000                   | 0.005                      |
| CA Topsoil | undisturbed    | -100            | 1.093                   | 0.005                      |
| CA Topsoil | undisturbed    | -250            | 0.837                   | 0.005                      |
| CA Topsoil | undisturbed    | -350            | 0.822                   | 0.005                      |
| CA Topsoil | undisturbed    | -450            | 0.770                   | 0.005                      |
| CA Topsoil | undisturbed    | -630            | 0.629                   | 0.005                      |
| CA Topsoil | undisturbed    | -996            | 0.000                   | 0.005                      |
| CT Subsoil | sieved         | -70             | 1.000                   | 0.003                      |
| CT Subsoil | sieved         | -100            | 1.049                   | 0.003                      |
| CT Subsoil | sieved         | -250            | 0.827                   | 0.003                      |
| CT Subsoil | sieved         | -350            | 0.882                   | 0.003                      |
| CT Subsoil | sieved         | -450            | 0.715                   | 0.003                      |
| CT Subsoil | sieved         | -630            | 0.568                   | 0.003                      |

|            |             |      |       |       |
|------------|-------------|------|-------|-------|
| CT Subsoil | sieved      | -996 | 0.072 | 0.003 |
| CT Subsoil | undisturbed | -70  | 1.000 | 0.005 |
| CT Subsoil | undisturbed | -100 | 0.954 | 0.005 |
| CT Subsoil | undisturbed | -250 | 0.839 | 0.005 |
| CT Subsoil | undisturbed | -350 | 0.843 | 0.005 |
| CT Subsoil | undisturbed | -450 | 0.683 | 0.005 |
| CT Subsoil | undisturbed | -630 | 1.206 | 0.005 |
| CT Subsoil | undisturbed | -996 | 0.004 | 0.005 |
| CT Topsoil | sieved      | -70  | 1.000 | 0.003 |
| CT Topsoil | sieved      | -100 | 0.810 | 0.003 |
| CT Topsoil | sieved      | -250 | 0.842 | 0.003 |
| CT Topsoil | sieved      | -350 | 1.147 | 0.003 |
| CT Topsoil | sieved      | -450 | 0.914 | 0.003 |
| CT Topsoil | sieved      | -630 | 0.814 | 0.003 |
| CT Topsoil | sieved      | -996 | 0.325 | 0.003 |
| CT Topsoil | undisturbed | -70  | 1.000 | 0.005 |
| CT Topsoil | undisturbed | -100 | 0.779 | 0.005 |
| CT Topsoil | undisturbed | -250 | 0.578 | 0.005 |
| CT Topsoil | undisturbed | -350 | 0.224 | 0.005 |
| CT Topsoil | undisturbed | -450 | 0.000 | 0.005 |
| CT Topsoil | undisturbed | -630 | 0.000 | 0.005 |
| CT Topsoil | undisturbed | -996 | 0.000 | 0.005 |

**Table S8: Average relative electrical conductivity of the Electrode Pair 4 and standard error of the mean relative respiration of each soil treatment type. The data was normalized to the values at -70hPa and is graphically represented in Fig.2 of the main body of the article. CT stands for conventional tillage and CA stands for conservation agriculture. The sieved samples were sieved down to a 2 mm particle size and packed to a bulk density of 1.73 g/cm<sup>3</sup>.**

| Treatment  | Soil structure | Applied suction | Electrical Conductivity | Standard error of the mean |
|------------|----------------|-----------------|-------------------------|----------------------------|
| CA Subsoil | sieved         | -70             | 1.000                   | 0.015                      |
| CA Subsoil | sieved         | -100            | 0.891                   | 0.015                      |
| CA Subsoil | sieved         | -250            | 0.771                   | 0.015                      |
| CA Subsoil | sieved         | -350            | 0.799                   | 0.015                      |
| CA Subsoil | sieved         | -450            | 0.780                   | 0.015                      |
| CA Subsoil | sieved         | -630            | 0.498                   | 0.015                      |
| CA Subsoil | undisturbed    | -70             | 1.000                   | 0.009                      |
| CA Subsoil | undisturbed    | -100            | 0.989                   | 0.009                      |
| CA Subsoil | undisturbed    | -250            | 0.937                   | 0.009                      |
| CA Subsoil | undisturbed    | -350            | 0.784                   | 0.009                      |
| CA Subsoil | undisturbed    | -450            | 0.591                   | 0.009                      |
| CA Subsoil | undisturbed    | -630            | 0.537                   | 0.009                      |
| CA Subsoil | undisturbed    | -996            | 0.000                   | 0.009                      |
| CA Topsoil | sieved         | -70             | 1.000                   | 0.015                      |
| CA Topsoil | sieved         | -100            | 1.137                   | 0.015                      |
| CA Topsoil | sieved         | -250            | 0.818                   | 0.015                      |
| CA Topsoil | sieved         | -350            | 0.771                   | 0.015                      |
| CA Topsoil | sieved         | -450            | 0.566                   | 0.015                      |
| CA Topsoil | sieved         | -630            | 0.362                   | 0.015                      |
| CA Topsoil | sieved         | -996            | 0.000                   | 0.015                      |
| CA Topsoil | undisturbed    | -70             | 1.000                   | 0.009                      |
| CA Topsoil | undisturbed    | -100            | 1.016                   | 0.009                      |
| CA Topsoil | undisturbed    | -250            | 0.917                   | 0.009                      |
| CA Topsoil | undisturbed    | -350            | 0.921                   | 0.009                      |
| CA Topsoil | undisturbed    | -450            | 0.959                   | 0.009                      |
| CA Topsoil | undisturbed    | -630            | 0.775                   | 0.009                      |
| CA Topsoil | undisturbed    | -996            | 0.000                   | 0.009                      |
| CT Subsoil | sieved         | -70             | 1.000                   | 0.015                      |
| CT Subsoil | sieved         | -100            | 1.108                   | 0.015                      |
| CT Subsoil | sieved         | -250            | 0.975                   | 0.015                      |
| CT Subsoil | sieved         | -350            | 1.017                   | 0.015                      |
| CT Subsoil | sieved         | -450            | 0.992                   | 0.015                      |
| CT Subsoil | sieved         | -630            | 0.716                   | 0.015                      |

|            |             |      |       |       |
|------------|-------------|------|-------|-------|
| CT Subsoil | sieved      | -996 | 0.001 | 0.015 |
| CT Subsoil | undisturbed | -70  | 1.000 | 0.009 |
| CT Subsoil | undisturbed | -100 | 0.920 | 0.009 |
| CT Subsoil | undisturbed | -250 | 0.890 | 0.009 |
| CT Subsoil | undisturbed | -350 | 0.884 | 0.009 |
| CT Subsoil | undisturbed | -450 | 0.754 | 0.009 |
| CT Subsoil | undisturbed | -630 | 0.716 | 0.009 |
| CT Subsoil | undisturbed | -996 | 0.000 | 0.009 |
| CT Topsoil | sieved      | -70  | 1.000 | 0.015 |
| CT Topsoil | sieved      | -100 | 1.321 | 0.015 |
| CT Topsoil | sieved      | -250 | 1.501 | 0.015 |
| CT Topsoil | sieved      | -350 | 0.291 | 0.015 |
| CT Topsoil | sieved      | -450 | 1.163 | 0.015 |
| CT Topsoil | sieved      | -630 | 1.524 | 0.015 |
| CT Topsoil | sieved      | -996 | 0.183 | 0.015 |
| CT Topsoil | undisturbed | -70  | 1.000 | 0.009 |
| CT Topsoil | undisturbed | -100 | 1.015 | 0.009 |
| CT Topsoil | undisturbed | -250 | 0.609 | 0.009 |
| CT Topsoil | undisturbed | -350 | 0.468 | 0.009 |
| CT Topsoil | undisturbed | -450 | 0.447 | 0.009 |
| CT Topsoil | undisturbed | -630 | 0.490 | 0.009 |
| CT Topsoil | undisturbed | -996 | 0.000 | 0.009 |

S3: Full range of electrical conductivity and soil respiration rate at different matric potentials

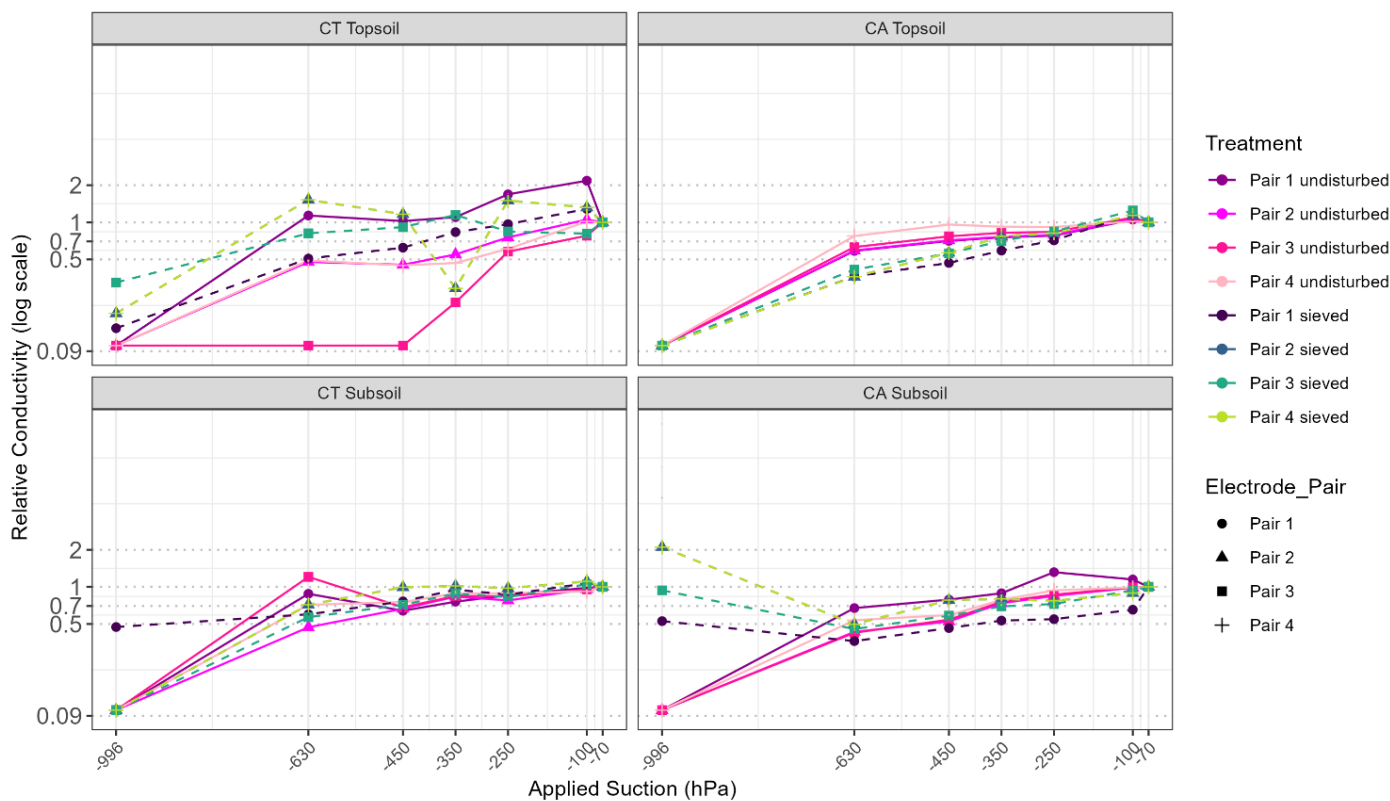

60 Fig. S4: Mean relative electrical conductivity, normalised to the rate observed at -70 hPa, is shown for sieved (dashed line) and undisturbed (solid line) for the two different sample depths of the two field treatment types across a range of applied suctions (hPa). The field treatment abbreviation CA stands for conservation tillage, while CT stands for conventional tillage. The included standard deviation is not visible given its size did not exceed the size of the symbols.

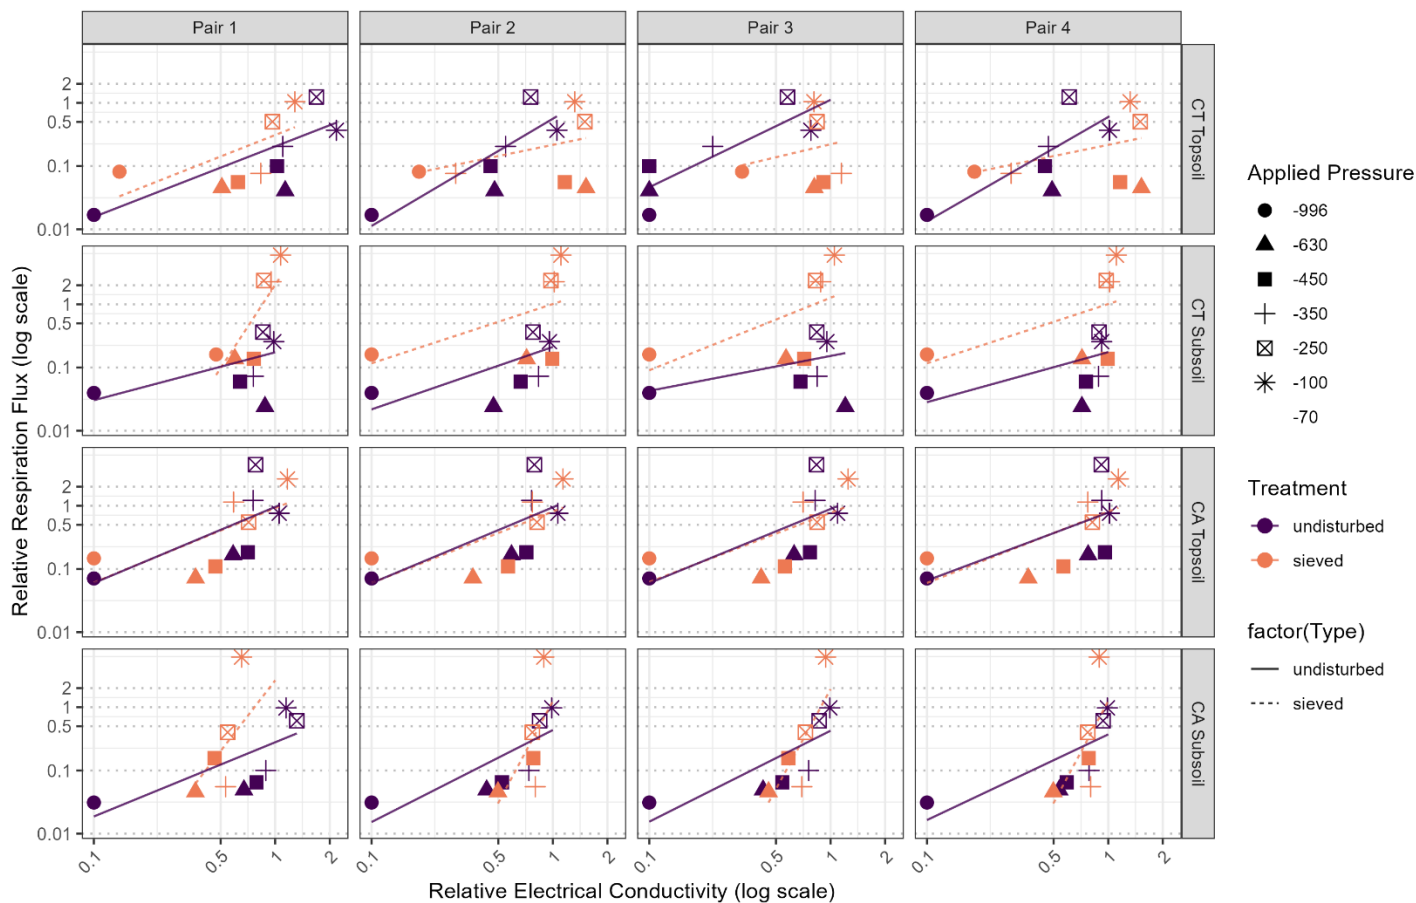

70 **Fig. S5:** Mean relative respiration flux after the onset of optimal matric potential at -250 hPa, in relation to the mean relative electrical conductivity, normalised to the rate observed at the value observed at -70 hPa, is shown for sieved (dashed line) and undisturbed (solid line) for the two sample depths of the two different field treatments across a range of applied suctions (hPa) illustrated by different marker points for the electrode pair 1 and 2. The relationship between the two parameters is visualized in the form of an exponential model. The field treatment abbreviation CA stands for conservation tillage, while CT stands for conventional tillage.

75 **Table S9: The R squared values associated with the correlation plots between the relative respiration rate and relative electrical conductivity normalized to the measured values at -70 hPa .CT stands for conventional tillage and CA stands for conservation agriculture. The sieved samples were sieved down to a 2 mm particle size and packed to a bulk density of 1.73 g/cm<sup>3</sup>.**

| <b>Treatment</b> | <b>Soil Type</b> | <b>Electrode Pair</b> | <b>R<sup>2</sup></b> | <b>P-value</b> |
|------------------|------------------|-----------------------|----------------------|----------------|
| CA Subsoil       | Sieved           | Pair 1                | 0.34                 | 0.420          |
| CA Subsoil       | Undisturbed      | Pair 1                | 0.82                 | 0.035          |
| CA Subsoil       | Sieved           | Pair 2                | 0.28                 | 0.474          |
| CA Subsoil       | Undisturbed      | Pair 2                | 0.74                 | 0.063          |
| CA Topsoil       | Sieved           | Pair 1                | 0.41                 | 0.245          |
| CA Topsoil       | Undisturbed      | Pair 1                | 0.54                 | 0.155          |
| CA Topsoil       | Sieved           | Pair 2                | 0.52                 | 0.170          |
| CA Topsoil       | Undisturbed      | Pair 2                | 0.55                 | 0.153          |
| CT Subsoil       | Sieved           | Pair 1                | 0.66                 | 0.094          |
| CT Subsoil       | Undisturbed      | Pair 1                | 0.10                 | 0.605          |
| CT Subsoil       | Sieved           | Pair 2                | 0.27                 | 0.369          |
| CT Subsoil       | Undisturbed      | Pair 2                | 0.34                 | 0.303          |
| CT Topsoil       | Sieved           | Pair 1                | 0.31                 | 0.326          |
| CT Topsoil       | Undisturbed      | Pair 1                | 0.76                 | 0.054          |
| CT Topsoil       | Sieved           | Pair 2                | 0.07                 | 0.676          |
| CT Topsoil       | Undisturbed      | Pair 2                | 0.84                 | 0.028          |
